# Supplementary material
Source: PubMed Central journal article supplement (PMC4997244)
Supplement: thnov06p1887s1.pdf [file thnov06p1887s1.pdf]

**Online Supplementary Material for**

**Targeting Negative Surface Charges of Cancer Cells by Multifunctional**

**Nanoprobes**

Bingdi Chen, et al.

**Table S1 | List of cell lines used in the experiments shown in Fig. 5A**

| Cell Line Names                 | Tissue Source                  | Species | Supplier             |
|---------------------------------|--------------------------------|---------|----------------------|
| Hela                            | Cervical cancer                | Human   | SICB*                |
| S180                            | Sarcoma                        | Mouse   | SICB                 |
| K562                            | Leukemia                       | Human   | SICB                 |
| HepG2                           | Liver cancer                   | Human   | SICB                 |
| LM-3                            | Liver cancer                   | Human   | Fudan University     |
| SKOV-3                          | Ovarian cancer                 | Human   | SICB                 |
| MCF-7                           | Breast cancer                  | Human   | SICB                 |
| PC-3                            | Prostate cancer                | Human   | SICB                 |
| LNCaP                           | Prostate cancer                | Human   | SICB                 |
| HCT116                          | Colon cancer                   | Human   | SICB                 |
| SW480                           | Colon cancer                   | Human   | Fudan University     |
| HGC-27                          | Gastric cancer                 | Human   | SICB                 |
| BGC-823                         | Gastric cancer                 | Human   | Fudan University     |
| A549                            | Lung cancer                    | Human   | SICB                 |
| F56                             | Gland cancer                   | Human   | Fudan University     |
| SW1990                          | Pancreatic cancer              | Human   | Changhai Hospital    |
| BxPC-3                          | Pancreatic cancer              | Human   | Changhai Hospital    |
| U87                             | glioma                         | Human   | SICB                 |
| HuH-7                           | Liver cancer                   | Human   | SICB                 |
| KB                              | Oral epidermoid carcinoma      | Human   | SICB                 |
| Caco-2                          | Colorectal adenocarcinoma      | Human   | SICB                 |
| CAL-27                          | Tongue squamous cell carcinoma | Human   | SICB                 |
| PMN (Polymorphic nuclear cells) | Peripheral blood               | Human   | Healthy volunteer    |
| MNC (mononuclear cells)         | Peripheral blood               | Human   | Healthy volunteer    |
| Hepatocytes                     | Liver                          | Rat     | Primary cell Culture |
| Kidney cells                    | Kidney                         | Mouse   | Primary cell Culture |

\*SICB=Shanghai Institute of Cell Biology (China)

## Supplementary Figures

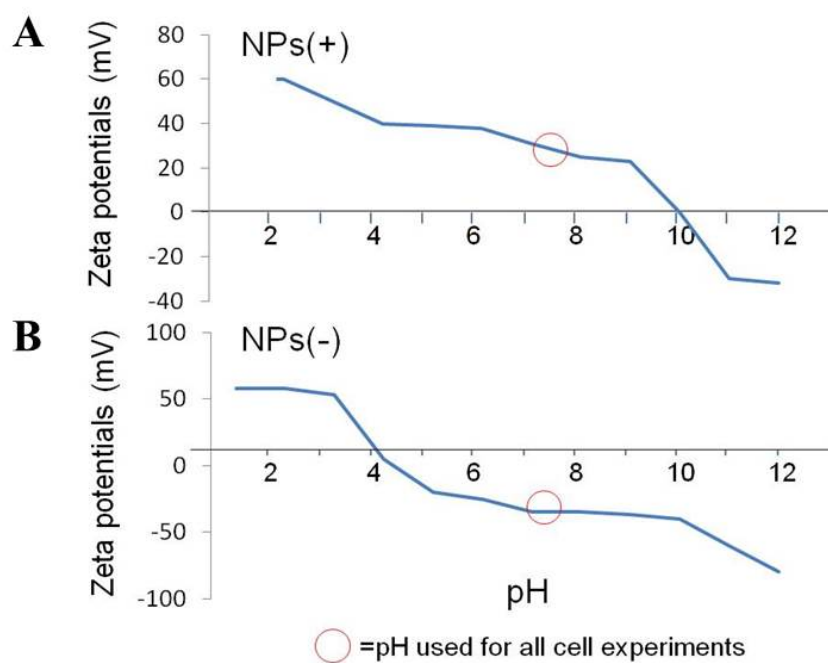

**Figure S1** Characterization of the paired NPs. (A) Zeta potential vs. pH for the positive NPs, and (B) Zeta potential vs. pH for the negative NPs. Note that the pH values for all cell experiments using the negative and positive NPs are marked by small circles.

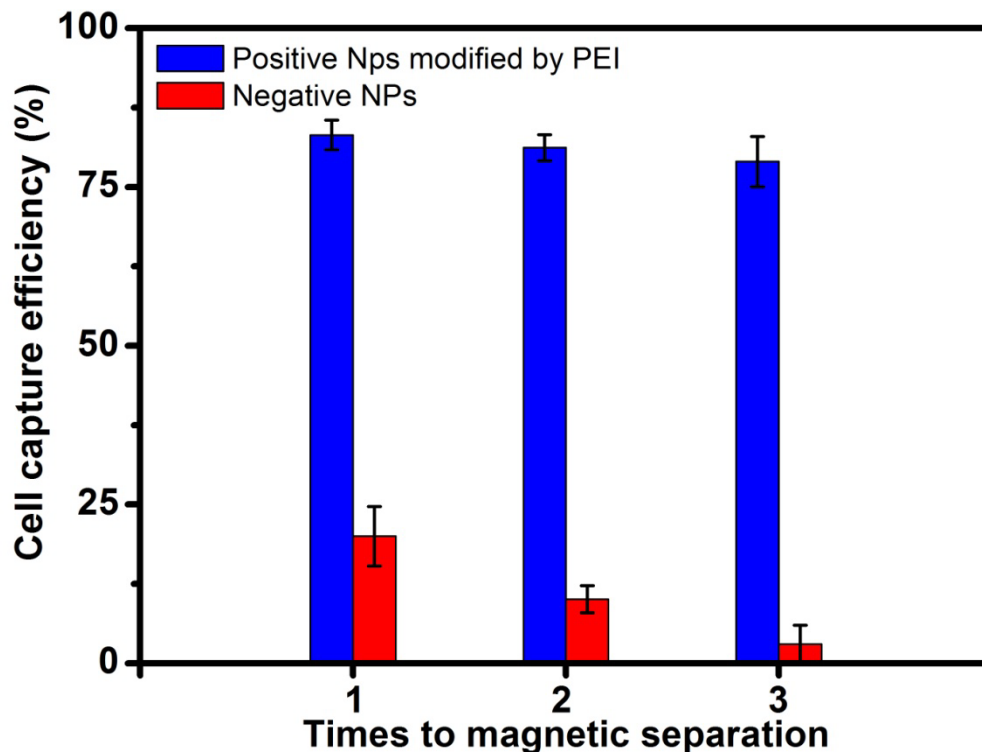

**Figure S2.** Effect of additional washes on the nonspecific binding of nanoprobe to cancer cells.

When a small portion of cancer cells bound to both positive and negative nanoprobe and captured, it seemed there might be a low level of nonspecific trapping of cells. In order to address this potential problem, we repeated the magnetic separation 2 times after resuspension in PBS (Figure S2). The results show that more than 85% of the bindings to the negative nanoprobe could be washed away, whereas the cells bound to the positive nanoprobe remained largely unchanged.

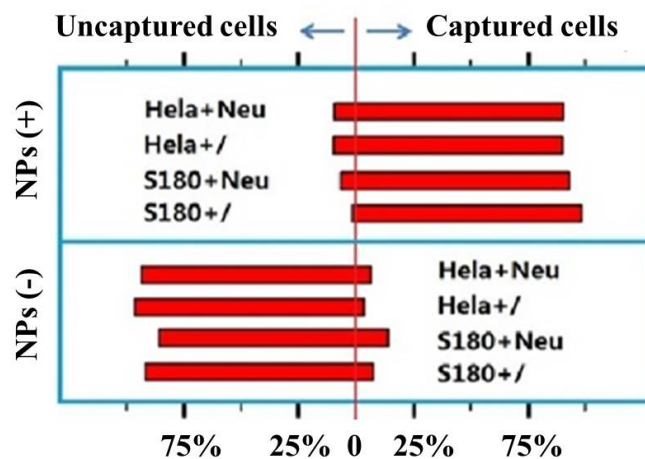

**Figure S3** Effect of saliva acid on cell surface on the percentages of cells captured by the positive and negative NPs. The magnetic capture efficiencies for both positive and negative NPs after the sialidase treatment. Neuraminidase (sialidase, 1.28 mg/ml) was added and co-incubated at 37°C for 30 min.

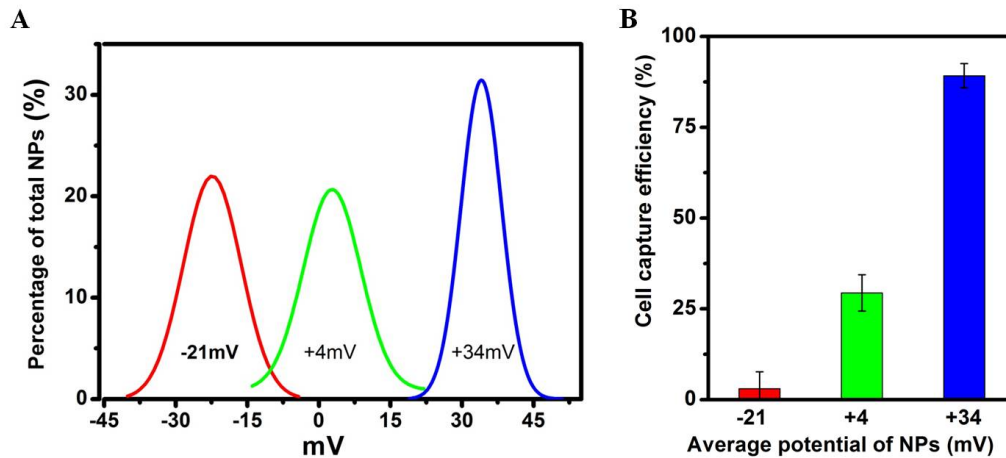

**Figure S4.** (A) Zeta potential distributions of NPs with average potentials of -21 mV, +4mV and +34 mV. (B) Magnetic capture efficiencies of K562 cells by three kinds of charge NPs.

To confirm that the efficiency of capture has a linear relationship with the level of positive charges on the nanoparticles, we created 3 different batches of nanoprobe with a gradient of average surface charges (Figure S4). The result shows that the capture efficiency of cancer cells is indeed proportional to level of surface positive charges.

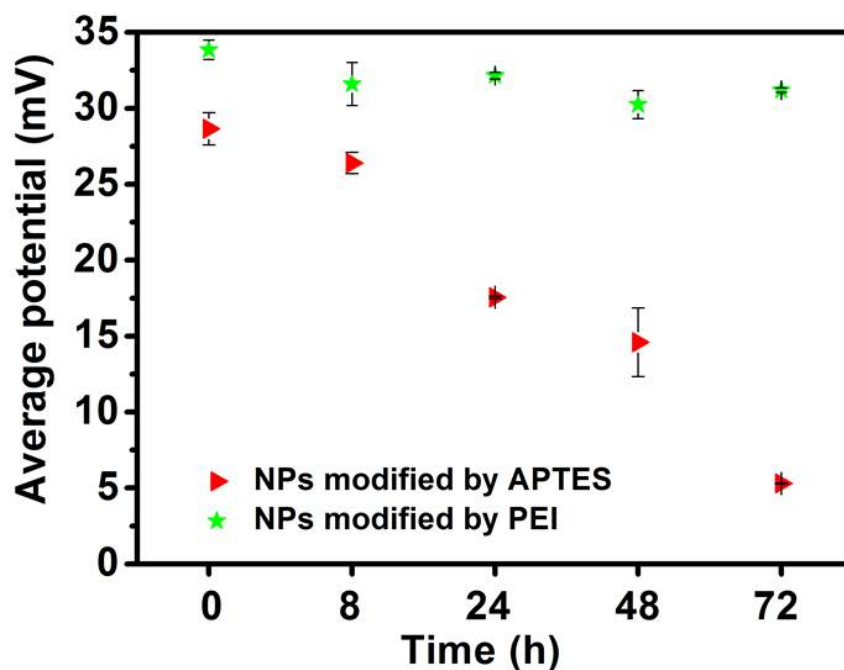

**Figure S5.** Different stabilities of the surface charges generated from PEI and APTES modification.

When we measured the average surface charges, it was apparent that the positive charges generated with PEI were stable for over 6 months, on the other hand, the positive charges generated with APTES were extremely unstable, more than 80% of the charges were lost within 72 hours (Figure S5).
